# Supplementary material for: Accuracy and Completeness of Drug Information in Wikipedia: A Comparison with Standard Textbooks of Pharmacology
Source: PubMed Central journal article supplement (PMC4174509; doi:10.1371/journal.pone.0106930), 2014-09-24
Supplement: pone.0106930.s002.pdf [file pone.0106930.s002.pdf]

**Table S2: Completeness and accuracy of drug information in Wikipedia.**

| <b>German Wikipedia</b> | <b>Completeness</b> | <b>Accuracy</b> |
|-------------------------|---------------------|-----------------|
| Acetylsalicylic acid    |                     |                 |
| I                       | 75%                 | 100%            |
| MA                      | 50%                 | 100%            |
| PK                      | 100%                | 100%            |
| AE                      | 75%                 | 100%            |
| CI                      | 100%                | 100%            |
| Total                   | 80%                 | 100%            |
| Aciclovir               |                     |                 |
| I                       | 100%                | 100%            |
| MA                      | 100%                | 100%            |
| PK                      | 100%                | 100%            |
| AE                      | 100%                | 100%            |
| CI                      | -                   | -               |
| Total                   | 100%                | 100%            |
| Alendronic acid         |                     |                 |
| I                       | 100%                | 100%            |
| MA                      | 75%                 | 100%            |
| PK                      | 100%                | 100%            |
| AE                      | 100%                | 100%            |
| CI                      | -                   | -               |
| Total                   | 94%                 | 100%            |
| Allopurinol             |                     |                 |
| I                       | 100%                | 100%            |
| MA                      | 75%                 | 100%            |
| PK                      | 50%                 | 100%            |
| AE                      | -                   | -               |
| CI                      | -                   | -               |
| Total                   | 75%                 | 100%            |
| Amantadine              |                     |                 |
| I                       | 100%                | 67%             |
| MA                      | 100%                | 100%            |
| PK                      | -                   | -               |
| AE                      | 100%                | 100%            |
| CI                      | -                   | -               |
| Total                   | 100%                | 89%             |
| Amiodarone              |                     |                 |
| I                       | 100%                | 100%            |
| MA                      | 100%                | 100%            |
| PK                      | 100%                | 100%            |
| AE                      | 100%                | 100%            |
| CI                      | -                   | -               |
| Total                   | 100%                | 100%            |
| Amitriptyline           |                     |                 |
| I                       | 100%                | 100%            |
| MA                      | 100%                | 100%            |
| PK                      | 100%                | 100%            |
| AE                      | 100%                | 100%            |
| CI                      | -                   | -               |
| Total                   | 100%                | 100%            |

|             |      |      |
|-------------|------|------|
| Amoxicillin |      |      |
| I           | 67%  | 100% |
| MA          | 100% | 100% |
| PK          | 0%   | -    |
| AE          | 100% | 100% |
| CI          | -    | -    |
| Total       | 67%  | 100% |

|          |      |      |
|----------|------|------|
| Atropine |      |      |
| I        | 80%  | 100% |
| MA       | 80%  | 100% |
| PK       | 67%  | 100% |
| AE       | 100% | 100% |
| CI       | -    | -    |
| Total    | 82%  | 100% |

|              |      |      |
|--------------|------|------|
| Azathioprine |      |      |
| I            | 100% | 100% |
| MA           | 100% | 100% |
| PK           | 100% | 100% |
| AE           | 100% | 100% |
| CI           | -    | -    |
| Total        | 100% | 100% |

|                  |      |      |
|------------------|------|------|
| Benzylpenicillin |      |      |
| I                | 100% | 100% |
| MA               | 100% | 100% |
| PK               | 100% | 100% |
| AE               | 67%  | 100% |
| CI               | -    | -    |
| Total            | 92%  | 100% |

|           |      |      |
|-----------|------|------|
| Biperiden |      |      |
| I         | 100% | 100% |
| MA        | 50%  | 100% |
| PK        | -    | -    |
| AE        | 100% | 100% |
| CI        | -    | -    |
| Total     | 83%  | 100% |

|               |      |      |
|---------------|------|------|
| Bromocriptine |      |      |
| I             | 75%  | 100% |
| MA            | 100% | 100% |
| PK            | -    | -    |
| AE            | 80%  | 100% |
| CI            | -    | -    |
| Total         | 85%  | 100% |

|               |      |      |
|---------------|------|------|
| Buprenorphine |      |      |
| I             | 100% | 100% |
| MA            | 100% | 100% |
| PK            | 100% | 75%  |
| AE            | -    | -    |
| CI            | -    | -    |
| Total         | 100% | 92%  |

|          |      |      |
|----------|------|------|
| Caffeine |      |      |
| I        | 100% | 100% |
| MA       | 90%  | 100% |
| PK       | 80%  | 100% |
| AE       | 43%  | 100% |
| CI       | -    | -    |
| Total    | 78%  | 100% |

|             |      |      |
|-------------|------|------|
| Candesartan |      |      |
| I           | 100% | 100% |
| MA          | 100% | 100% |
| PK          | 0%   | -    |
| AE          | -    | -    |
| CI          | -    | -    |
| Total       | 67%  | 100% |

|               |      |      |
|---------------|------|------|
| Carbamazepine |      |      |
| I             | 100% | 100% |
| MA            | 50%  | 100% |
| PK            | 100% | 100% |
| AE            | 100% | 100% |
| CI            | -    | -    |
| Total         | 88%  | 100% |

|         |      |      |
|---------|------|------|
| Cefepim |      |      |
| I       | 0%   | -    |
| MA      | 100% | 100% |
| PK      | 100% | 100% |
| AE      | 100% | 100% |
| CI      | -    | -    |
| Total   | 75%  | 100% |

|             |      |      |
|-------------|------|------|
| Ciclosporin |      |      |
| I           | 50%  | 100% |
| MA          | 100% | 100% |
| PK          | 0%   | -    |
| AE          | 83%  | 100% |
| CI          | -    | -    |
| Total       | 58%  | 100% |

|               |      |      |
|---------------|------|------|
| Ciprofloxacin |      |      |
| I             | 100% | 100% |
| MA            | 67%  | 100% |
| PK            | 50%  | 100% |
| AE            | 100% | 100% |
| CI            | 67%  | 100% |
| Total         | 77%  | 100% |

|                |      |      |
|----------------|------|------|
| Clarithromycin |      |      |
| I              | 80%  | 100% |
| MA             | 100% | 100% |
| PK             | 100% | 100% |
| AE             | 100% | 100% |
| CI             | -    | -    |
| Total          | 95%  | 100% |

|             |      |      |
|-------------|------|------|
| Clopidogrel |      |      |
| I           | 100% | 100% |
| MA          | 100% | 100% |
| PK          | 100% | 100% |
| AE          | 100% | 100% |
| CI          | -    | -    |
| Total       | 100% | 100% |

|         |      |      |
|---------|------|------|
| Cocaine |      |      |
| I       | -    | -    |
| MA      | 100% | 100% |
| PK      | 100% | 100% |
| AE      | 100% | 100% |
| CI      | -    | -    |
| Total   | 100% | 100% |

|                  |      |      |
|------------------|------|------|
| Cyclophosphamide |      |      |
| I                | 100% | 100% |
| MA               | 67%  | 100% |
| PK               | 100% | 100% |
| AE               | 100% | 100% |
| CI               | -    | -    |
| Total            | 92%  | 100% |

|          |      |      |
|----------|------|------|
| Diazepam |      |      |
| I        | 100% | 100% |
| MA       | 50%  | 100% |
| PK       | 50%  | 100% |
| AE       | 71%  | 100% |
| CI       | 100% | 100% |
| Total    | 74%  | 100% |

|         |      |      |
|---------|------|------|
| Digoxin |      |      |
| I       | 100% | 100% |
| MA      | 75%  | 100% |
| PK      | 75%  | 100% |
| AE      | 100% | 100% |
| CI      | 0%   | -    |
| Total   | 70%  | 100% |

|             |      |      |
|-------------|------|------|
| Domperidone |      |      |
| I           | 33%  | 100% |
| MA          | 100% | 100% |
| PK          | 100% | 100% |
| AE          | -    | -    |
| CI          | -    | -    |
| Total       | 78%  | 100% |

|           |      |      |
|-----------|------|------|
| Doxazosin |      |      |
| I         | 100% | 100% |
| MA        | 100% | 100% |
| PK        | -    | -    |
| AE        | 33%  | 100% |
| CI        | -    | -    |
| Total     | 78%  | 100% |

|             |      |      |
|-------------|------|------|
| Doxycycline |      |      |
| I           | 56%  | 100% |
| MA          | 100% | 100% |
| PK          | 57%  | 100% |
| AE          | 50%  | 100% |
| CI          | 100% | 100% |
| Total       | 73%  | 100% |

|                   |      |      |
|-------------------|------|------|
| Enoxaparin sodium |      |      |
| I                 | 100% | 100% |
| MA                | 100% | 100% |
| PK                | 100% | 100% |
| AE                | 100% | 100% |
| CI                | -    | -    |
| Total             | 100% | 100% |

|             |      |      |
|-------------|------|------|
| Epinephrine |      |      |
| I           | 100% | 100% |
| MA          | 100% | 100% |
| PK          | 100% | 100% |
| AE          | 100% | 100% |
| CI          | -    | -    |
| Total       | 100% | 100% |

|           |      |      |
|-----------|------|------|
| Estradiol |      |      |
| I         | 50%  | 100% |
| MA        | 60%  | 100% |
| PK        | 0%   | -    |
| AE        | 100% | 100% |
| CI        | -    | -    |
| Total     | 53%  | 100% |

|            |      |      |
|------------|------|------|
| Ethambutol |      |      |
| I          | 100% | 100% |
| MA         | 100% | 100% |
| PK         | 100% | 100% |
| AE         | 100% | 100% |
| CI         | -    | -    |
| Total      | 100% | 100% |

|         |      |      |
|---------|------|------|
| Ethanol |      |      |
| I       | -    | -    |
| MA      | 50%  | 100% |
| PK      | 56%  | 100% |
| AE      | 100% | 100% |
| CI      | -    | -    |
| Total   | 69%  | 100% |

|           |      |      |
|-----------|------|------|
| Exenatide |      |      |
| I         | 100% | 100% |
| MA        | 100% | 100% |
| PK        | -    | -    |
| AE        | 100% | 100% |
| CI        | -    | -    |
| Total     | 100% | 100% |

|             |      |      |
|-------------|------|------|
| Finasteride |      |      |
| I           | 100% | 100% |
| MA          | 100% | 100% |
| PK          | -    | -    |
| AE          | -    | -    |
| CI          | -    | -    |
| Total       | 100% | 100% |

|                |      |      |
|----------------|------|------|
| Flucloxacillin |      |      |
| I              | 100% | 100% |
| MA             | 100% | 100% |
| PK             | 20%  | 100% |
| AE             | -    | -    |
| CI             | -    | -    |
| Total          | 73%  | 100% |

|             |      |      |
|-------------|------|------|
| Fluconazole |      |      |
| I           | 100% | 100% |
| MA          | 100% | 100% |
| PK          | 0%   | -    |
| AE          | 100% | 100% |
| CI          | -    | -    |
| Total       | 75%  | 100% |

|            |      |      |
|------------|------|------|
| Flumazenil |      |      |
| I          | 100% | 100% |
| MA         | 100% | 100% |
| PK         | 50%  | 100% |
| AE         | -    | -    |
| CI         | -    | -    |
| Total      | 83%  | 100% |

|            |      |      |
|------------|------|------|
| Furosemide |      |      |
| I          | 100% | 100% |
| MA         | 100% | 100% |
| PK         | 75%  | 100% |
| AE         | 80%  | 100% |
| CI         | -    | -    |
| Total      | 89%  | 100% |

|            |      |      |
|------------|------|------|
| Gentamicin |      |      |
| I          | 100% | 100% |
| MA         | 67%  | 100% |
| PK         | 29%  | 100% |
| AE         | 100% | 100% |
| CI         | 50%  | 100% |
| Total      | 69%  | 100% |

|                     |      |      |
|---------------------|------|------|
| Glyceryl trinitrate |      |      |
| I                   | 100% | 100% |
| MA                  | 100% | 100% |
| PK                  | 75%  | 100% |
| AE                  | 100% | 100% |
| CI                  | -    | -    |
| Total               | 94%  | 100% |

|           |      |      |
|-----------|------|------|
| Goserelin |      |      |
| I         | 100% | 100% |
| MA        | 50%  | 100% |
| PK        | -    | -    |
| AE        | 0%   | -    |
| CI        | -    | -    |
| Total     | 50%  | 100% |

|                         |      |      |
|-------------------------|------|------|
| Heparin, unfractionated |      |      |
| I                       | 100% | 100% |
| MA                      | 100% | 100% |
| PK                      | 100% | 100% |
| AE                      | 50%  | 100% |
| CI                      | 100% | 100% |
| Total                   | 90%  | 100% |

|                     |      |      |
|---------------------|------|------|
| Hydrochlorothiazide |      |      |
| I                   | 67%  | 100% |
| MA                  | 100% | 100% |
| PK                  | 50%  | 100% |
| AE                  | 100% | 100% |
| CI                  | -    | -    |
| Total               | 79%  | 100% |

|           |      |      |
|-----------|------|------|
| Ibuprofen |      |      |
| I         | 100% | 100% |
| MA        | 100% | 100% |
| PK        | 0%   | -    |
| AE        | 100% | 100% |
| CI        | -    | -    |
| Total     | 75%  | 100% |

|          |      |      |
|----------|------|------|
| Imipenem |      |      |
| I        | 100% | 100% |
| MA       | 100% | 100% |
| PK       | 80%  | 100% |
| AE       | 0%   | -    |
| CI       | -    | -    |
| Total    | 70%  | 100% |

|                |      |      |
|----------------|------|------|
| Insulin lispro |      |      |
| I              | 100% | 100% |
| MA             | 100% | 100% |
| PK             | 33%  | 100% |
| AE             | 100% | 100% |
| CI             | -    | -    |
| Total          | 83%  | 100% |

|            |      |      |
|------------|------|------|
| Isoflurane |      |      |
| I          | 100% | 100% |
| MA         | 100% | 100% |
| PK         | 25%  | 100% |
| AE         | -    | -    |
| CI         | -    | -    |
| Total      | 75%  | 100% |

|           |      |      |
|-----------|------|------|
| Isoniazid |      |      |
| I         | 100% | 100% |
| MA        | 100% | 100% |
| PK        | 75%  | 100% |
| AE        | 100% | 100% |
| CI        | -    | -    |
| Total     | 94%  | 100% |

|             |      |      |
|-------------|------|------|
| Lamotrigine |      |      |
| I           | 33%  | 100% |
| MA          | 100% | 100% |
| PK          | -    | -    |
| AE          | 100% | 100% |
| CI          | -    | -    |
| Total       | 78%  | 100% |

|          |      |      |
|----------|------|------|
| Levodopa |      |      |
| I        | 100% | 100% |
| MA       | 67%  | 100% |
| PK       | -    | -    |
| AE       | 50%  | 100% |
| CI       | -    | -    |
| Total    | 72%  | 100% |

|         |      |      |
|---------|------|------|
| Lithium |      |      |
| I       | 75%  | 100% |
| MA      | 100% | 100% |
| PK      | 50%  | 100% |
| AE      | 50%  | 100% |
| CI      | 100% | 100% |
| Total   | 75%  | 100% |

|            |      |      |
|------------|------|------|
| Loperamide |      |      |
| I          | 100% | 100% |
| MA         | 0%   | -    |
| PK         | 100% | 100% |
| AE         | -    | -    |
| CI         | 0%   | -    |
| Total      | 50%  | 100% |

|            |      |      |
|------------|------|------|
| Metamizole |      |      |
| I          | 100% | 100% |
| MA         | 100% | 100% |
| PK         | 100% | 100% |
| AE         | 100% | 100% |
| CI         | -    | -    |
| Total      | 100% | 100% |

|           |      |      |
|-----------|------|------|
| Metformin |      |      |
| I         | 100% | 100% |
| MA        | 100% | 100% |
| PK        | 0%   | -    |
| AE        | 100% | 100% |
| CI        | 88%  | 100% |
| Total     | 78%  | 100% |

|          |      |      |
|----------|------|------|
| Methanol |      |      |
| I        | -    | -    |
| MA       | 100% | 100% |
| PK       | 100% | 100% |
| AE       | -    | -    |
| CI       | -    | -    |
| Total    | 100% | 100% |

|              |      |      |
|--------------|------|------|
| Methotrexate |      |      |
| I            | 100% | 100% |
| MA           | 75%  | 100% |
| PK           | 100% | 100% |
| AE           | 80%  | 100% |
| CI           | -    | -    |
| Total        | 89%  | 100% |

|            |      |      |
|------------|------|------|
| Methyldopa |      |      |
| I          | 100% | 100% |
| MA         | 100% | 100% |
| PK         | 100% | 100% |
| AE         | 100% | 100% |
| CI         | -    | -    |
| Total      | 100% | 100% |

|                 |      |      |
|-----------------|------|------|
| Methylphenidate |      |      |
| I               | 100% | 100% |
| MA              | 100% | 100% |
| PK              | -    | -    |
| AE              | 100% | 100% |
| CI              | -    | -    |
| Total           | 100% | 100% |

|                |      |      |
|----------------|------|------|
| Metoclopramide |      |      |
| I              | 100% | 100% |
| MA             | 67%  | 100% |
| PK             | -    | -    |
| AE             | 50%  | 100% |
| CI             | -    | -    |
| Total          | 72%  | 100% |

|            |      |      |
|------------|------|------|
| Metoprolol |      |      |
| I          | 100% | 100% |
| MA         | 100% | 100% |
| PK         | 67%  | 100% |
| AE         | 100% | 67%  |
| CI         | 100% | 100% |
| Total      | 93%  | 93%  |

|               |      |      |
|---------------|------|------|
| Metronidazole |      |      |
| I             | 67%  | 100% |
| MA            | 100% | 100% |
| PK            | 100% | 100% |
| AE            | 100% | 100% |
| CI            | 100% | 100% |
| Total         | 93%  | 100% |

|              |      |      |
|--------------|------|------|
| Mifepristone |      |      |
| I            | 100% | 100% |
| MA           | 100% | 100% |
| PK           | -    | -    |
| AE           | -    | -    |
| CI           | -    | -    |
| Total        | 100% | 100% |

|             |      |      |
|-------------|------|------|
| Mirtazapine |      |      |
| I           | 50%  | 100% |
| MA          | 100% | 100% |
| PK          | -    | -    |
| AE          | -    | -    |
| CI          | -    | -    |
| Total       | 75%  | 100% |

|             |      |      |
|-------------|------|------|
| Molsidomine |      |      |
| I           | 100% | 100% |
| MA          | 100% | 67%  |
| PK          | 100% | 100% |
| AE          | 100% | 100% |
| CI          | -    | -    |
| Total       | 100% | 92%  |

|          |      |      |
|----------|------|------|
| Morphine |      |      |
| I        | 100% | 100% |
| MA       | 80%  | 100% |
| PK       | 25%  | 100% |
| AE       | 50%  | 100% |
| CI       | 0%   | -    |
| Total    | 51%  | 100% |

|          |      |      |
|----------|------|------|
| Naloxone |      |      |
| I        | 50%  | 100% |
| MA       | 100% | 100% |
| PK       | 50%  | 100% |
| AE       | 100% | 100% |
| CI       | -    | -    |
| Total    | 75%  | 100% |

|          |     |      |
|----------|-----|------|
| Nicotine |     |      |
| I        | -   | -    |
| MA       | 80% | 100% |
| PK       | 50% | 100% |
| AE       | 33% | 100% |
| CI       | -   | -    |
| Total    | 54% | 100% |

|            |      |      |
|------------|------|------|
| Nifedipine |      |      |
| I          | 100% | 100% |
| MA         | 100% | 100% |
| PK         | 0%   | -    |
| AE         | 100% | 100% |
| CI         | -    | -    |
| Total      | 75%  | 100% |

|                |      |      |
|----------------|------|------|
| Norepinephrine |      |      |
| I              | 100% | 100% |
| MA             | 50%  | 100% |
| PK             | 67%  | 100% |
| AE             | 100% | 100% |
| CI             | -    | -    |
| Total          | 79%  | 100% |

|            |      |      |
|------------|------|------|
| Omeprazole |      |      |
| I          | 100% | 100% |
| MA         | 50%  | 100% |
| PK         | 80%  | 100% |
| AE         | 80%  | 100% |
| CI         | -    | -    |
| Total      | 78%  | 100% |

|             |      |      |
|-------------|------|------|
| Ondansetron |      |      |
| I           | 100% | 100% |
| MA          | 100% | 100% |
| PK          | 25%  | 100% |
| AE          | 100% | 100% |
| CI          | -    | -    |
| Total       | 81%  | 100% |

|            |      |      |
|------------|------|------|
| Paclitaxel |      |      |
| I          | 100% | 100% |
| MA         | 100% | 100% |
| PK         | -    | -    |
| AE         | 100% | 100% |
| CI         | -    | -    |
| Total      | 100% | 100% |

|             |      |      |
|-------------|------|------|
| Pancuronium |      |      |
| I           | 50%  | 100% |
| MA          | 100% | 100% |
| PK          | 100% | 100% |
| AE          | 100% | 100% |
| CI          | -    | -    |
| Total       | 88%  | 100% |

|             |      |      |
|-------------|------|------|
| Perchlorate |      |      |
| I           | 100% | 100% |
| MA          | 100% | 100% |
| PK          | -    | -    |
| AE          | 0%   | -    |
| CI          | -    | -    |
| Total       | 67%  | 100% |

|               |      |      |
|---------------|------|------|
| Phenobarbital |      |      |
| I             | 100% | 100% |
| MA            | 100% | 100% |
| PK            | 100% | 100% |
| AE            | 100% | 100% |
| CI            | -    | -    |
| Total         | 100% | 100% |

|               |      |      |
|---------------|------|------|
| Physostigmine |      |      |
| I             | 100% | 100% |
| MA            | 75%  | 100% |
| PK            | 100% | 100% |
| AE            | 100% | 100% |
| CI            | -    | -    |
| Total         | 94%  | 100% |

|             |      |      |
|-------------|------|------|
| Pilocarpine |      |      |
| I           | 100% | 100% |
| MA          | 67%  | 100% |
| PK          | 100% | 100% |
| AE          | 0%   | -    |
| CI          | -    | -    |
| Total       | 67%  | 100% |

|              |      |      |
|--------------|------|------|
| Piperacillin |      |      |
| I            | 100% | 100% |
| MA           | 100% | 100% |
| PK           | 100% | 100% |
| AE           | -    | -    |
| CI           | -    | -    |
| Total        | 100% | 100% |

|              |     |      |
|--------------|-----|------|
| Prednisolone |     |      |
| I            | 86% | 100% |
| MA           | 43% | 100% |
| PK           | 0%  | -    |
| AE           | 45% | 100% |
| CI           | 50% | 100% |
| Total        | 45% | 100% |

|          |      |      |
|----------|------|------|
| Propofol |      |      |
| I        | 100% | 100% |
| MA       | 100% | 100% |
| PK       | 0%   | -    |
| AE       | 100% | 100% |
| CI       | -    | -    |
| Total    | 75%  | 100% |

|              |      |      |
|--------------|------|------|
| Pyrazinamide |      |      |
| I            | 100% | 100% |
| MA           | 33%  | 100% |
| PK           | 75%  | 100% |
| AE           | 100% | 100% |
| CI           | -    | -    |
| Total        | 77%  | 100% |

|          |      |      |
|----------|------|------|
| Ramipril |      |      |
| I        | 100% | 100% |
| MA       | 100% | 100% |
| PK       | -    | -    |
| AE       | 100% | 100% |
| CI       | 100% | 100% |
| Total    | 100% | 100% |

|            |      |      |
|------------|------|------|
| Ranitidine |      |      |
| I          | 100% | 100% |
| MA         | 100% | 100% |
| PK         | -    | -    |
| AE         | 67%  | 100% |
| CI         | -    | -    |
| Total      | 89%  | 100% |

|             |      |      |
|-------------|------|------|
| Repaglinide |      |      |
| I           | 100% | 100% |
| MA          | 100% | 100% |
| PK          | 100% | 100% |
| AE          | 100% | 100% |
| CI          | -    | -    |
| Total       | 100% | 100% |

|            |      |      |
|------------|------|------|
| Rifampicin |      |      |
| I          | 100% | 100% |
| MA         | 100% | 100% |
| PK         | 0%   | -    |
| AE         | 43%  | 100% |
| CI         | 33%  | 100% |
| Total      | 55%  | 100% |

|           |      |      |
|-----------|------|------|
| Rituximab |      |      |
| I         | 100% | 100% |
| MA        | 100% | 100% |
| PK        | -    | -    |
| AE        | -    | -    |
| CI        | -    | -    |
| Total     | 100% | 100% |

|             |      |      |
|-------------|------|------|
| Rivaroxaban |      |      |
| I           | 100% | 100% |
| MA          | 100% | 100% |
| PK          | 100% | 100% |
| AE          | -    | -    |
| CI          | -    | -    |
| Total       | 100% | 100% |

|             |      |      |
|-------------|------|------|
| Sitagliptin |      |      |
| I           | 100% | 100% |
| MA          | 100% | 100% |
| PK          | 100% | 100% |
| AE          | -    | -    |
| CI          | -    | -    |
| Total       | 100% | 100% |

|              |      |      |
|--------------|------|------|
| Somatotropin |      |      |
| I            | 100% | 100% |
| MA           | 100% | 100% |
| PK           | -    | -    |
| AE           | -    | -    |
| CI           | -    | -    |
| Total        | 100% | 100% |

|                |      |      |
|----------------|------|------|
| Spironolactone |      |      |
| I              | 100% | 100% |
| MA             | 100% | 100% |
| PK             | 100% | 100% |
| AE             | 100% | 100% |
| CI             | -    | -    |
| Total          | 100% | 100% |

|               |      |      |
|---------------|------|------|
| Suxamethonium |      |      |
| I             | 100% | 100% |
| MA            | 75%  | 100% |
| PK            | 100% | 100% |
| AE            | 80%  | 100% |
| CI            | -    | -    |
| Total         | 89%  | 100% |

|           |      |      |
|-----------|------|------|
| Tamoxifen |      |      |
| I         | 100% | 100% |
| MA        | 100% | 100% |
| PK        | -    | -    |
| AE        | 100% | 100% |
| CI        | -    | -    |
| Total     | 100% | 100% |

|            |      |      |
|------------|------|------|
| Tazobactam |      |      |
| I          | 50%  | 100% |
| MA         | 100% | 100% |
| PK         | 100% | 100% |
| AE         | -    | -    |
| CI         | -    | -    |
| Total      | 83%  | 100% |

|                          |      |      |
|--------------------------|------|------|
| Thiamazole (Methimazole) |      |      |
| I                        | 100% | 100% |
| MA                       | 50%  | 100% |
| PK                       | 0%   | -    |
| AE                       | 100% | 100% |
| CI                       | -    | -    |
| Total                    | 63%  | 100% |

|          |      |      |
|----------|------|------|
| Tramadol |      |      |
| I        | 100% | 100% |
| MA       | 100% | 100% |
| PK       | 100% | 100% |
| AE       | -    | -    |
| CI       | -    | -    |
| Total    | 100% | 100% |

|               |      |      |
|---------------|------|------|
| Valproic acid |      |      |
| I             | 67%  | 100% |
| MA            | 50%  | 100% |
| PK            | 50%  | 100% |
| AE            | 100% | 100% |
| CI            | -    | -    |
| Total         | 67%  | 100% |

|            |      |      |
|------------|------|------|
| Vancomycin |      |      |
| I          | 100% | 100% |
| MA         | 100% | 100% |
| PK         | 33%  | 100% |
| AE         | 67%  | 100% |
| CI         | -    | -    |
| Total      | 75%  | 100% |

|            |      |      |
|------------|------|------|
| Zidovudine |      |      |
| I          | 100% | 100% |
| MA         | 100% | 100% |
| PK         | -    | -    |
| AE         | 100% | 100% |
| CI         | -    | -    |
| Total      | 100% | 100% |

| English Wikipedia | Completeness | Accuracy |
|-------------------|--------------|----------|
|-------------------|--------------|----------|

|                      |      |      |
|----------------------|------|------|
| Acetylsalicylic acid |      |      |
| I                    | 100% | 100% |
| MOA                  | 100% | 100% |
| PK                   | 75%  | 100% |
| AE                   | 44%  | 100% |
| CI                   | -    | -    |
| Total                | 80%  | 100% |

|           |      |      |
|-----------|------|------|
| Aciclovir |      |      |
| I         | 100% | 100% |
| MOA       | 100% | 100% |
| PK        | 83%  | 100% |
| AE        | 100% | 100% |
| CI        | -    | -    |

|               |      |      |
|---------------|------|------|
| Total         | 96%  | 100% |
| Allopurinol   |      |      |
| I             | 100% | 100% |
| MOA           | 100% | 100% |
| PK            | 75%  | 100% |
| AE            | 100% | 100% |
| CI            | -    | -    |
| Total         | 94%  | 100% |
| Amantadine    |      |      |
| I             | 50%  | 100% |
| MOA           | 100% | 100% |
| PK            | -    | -    |
| AE            | 50%  | 100% |
| CI            | -    | -    |
| Total         | 67%  | 100% |
| Amitriptyline |      |      |
| I             | 100% | 100% |
| MOA           | 100% | 100% |
| PK            | 80%  | 100% |
| AE            | 100% | 100% |
| CI            | -    | -    |
| Total         | 95%  | 100% |
| Amoxicillin   |      |      |
| I             | 100% | 100% |
| MOA           | 100% | 100% |
| PK            | 0%   | -    |
| AE            | 83%  | 100% |
| CI            | -    | -    |
| Total         | 71%  | 100% |
| Atropine      |      |      |
| I             | 100% | 100% |
| MOA           | 80%  | 100% |
| PK            | 100% | 100% |
| AE            | 100% | 100% |
| CI            | 100% | 100% |
| Total         | 96%  | 100% |
| Azathioprine  |      |      |
| I             | 100% | 100% |
| MOA           | 100% | 100% |
| PK            | 100% | 100% |
| AE            | 75%  | 100% |
| CI            | -    | -    |
| Total         | 94%  | 100% |
| Bromocriptine |      |      |
| I             | 100% | 100% |
| MOA           | 100% | 67%  |
| PK            | -    | -    |
| AE            | 100% | 100% |
| CI            | -    | -    |
| Total         | 100% | 89%  |
| Buprenorphine |      |      |
| I             | 100% | 100% |
| MOA           | 100% | 100% |
| PK            | 100% | 100% |
| AE            | -    | -    |
| CI            | -    | -    |

|               |      |      |
|---------------|------|------|
| Total         | 100% | 100% |
| Candesartan   |      |      |
| I             | 100% | 100% |
| MOA           | 100% | 100% |
| PK            | -    | -    |
| AE            | 100% | 100% |
| CI            | -    | -    |
| Total         | 100% | 100% |
| Carpamazepine |      |      |
| I             | 100% | 100% |
| MOA           | 100% | 100% |
| PK            | 100% | 100% |
| AE            | 67%  | 100% |
| CI            | -    | -    |
| Total         | 92%  | 100% |
| Ciprofloxacin |      |      |
| I             | 71%  | 100% |
| MOA           | 100% | 100% |
| PK            | 100% | 100% |
| AE            | 100% | 100% |
| CI            | -    | -    |
| Total         | 93%  | 100% |
| Clopidogrel   |      |      |
| I             | 100% | 100% |
| MOA           | 100% | 100% |
| PK            | -    | -    |
| AE            | 100% | 100% |
| CI            | -    | -    |
| Total         | 100% | 100% |
| Diazepam      |      |      |
| I             | 100% | 100% |
| MOA           | 100% | 100% |
| PK            | 100% | 100% |
| AE            | 50%  | 100% |
| CI            | -    | -    |
| Total         | 88%  | 100% |
| Domperidone   |      |      |
| I             | 100% | 100% |
| MOA           | 100% | 100% |
| PK            | 100% | 100% |
| AE            | -    | -    |
| CI            | -    | -    |
| Total         | 100% | 100% |
| Doxazosin     |      |      |
| I             | 100% | 100% |
| MOA           | 75%  | 100% |
| PK            | 100% | 100% |
| AE            | 0%   | -    |
| CI            | -    | -    |
| Total         | 69%  | 100% |
| Ethambutol    |      |      |
| I             | 100% | 100% |
| MOA           | 100% | 100% |
| PK            | 67%  | 100% |
| AE            | 100% | 100% |
| CI            | -    | -    |

|                    |      |      |
|--------------------|------|------|
| Total              | 92%  | 100% |
| Finasteride        |      |      |
| I                  | 100% | 100% |
| MOA                | 100% | 100% |
| PK                 | 100% | 100% |
| AE                 | -    | -    |
| CI                 | -    | -    |
| Total              | 100% | 100% |
| Fluconazole        |      |      |
| I                  | 100% | 100% |
| MOA                | 100% | 100% |
| PK                 | 75%  | 100% |
| AE                 | 100% | 100% |
| CI                 | -    | -    |
| Total              | 94%  | 100% |
| Flumazenil         |      |      |
| I                  | 100% | 100% |
| MOA                | 100% | 100% |
| PK                 | -    | -    |
| AE                 | 100% | 100% |
| CI                 | -    | -    |
| Total              | 100% | 100% |
| Gentamicin         |      |      |
| I                  | 67%  | 100% |
| MOA                | 100% | 100% |
| PK                 | 60%  | 100% |
| AE                 | 100% | 100% |
| CI                 | -    | -    |
| Total              | 82%  | 100% |
| Hydrochlorthiazide |      |      |
| I                  | 100% | 100% |
| MOA                | 100% | 100% |
| PK                 | 67%  | 100% |
| AE                 | 67%  | 100% |
| CI                 | -    | -    |
| Total              | 83%  | 100% |
| Ibuprofen          |      |      |
| I                  | 67%  | 100% |
| MOA                | 100% | 100% |
| PK                 | -    | -    |
| AE                 | 90%  | 100% |
| CI                 | -    | -    |
| Total              | 86%  | 100% |
| Imipenem           |      |      |
| I                  | 100% | 100% |
| MOA                | 100% | 100% |
| PK                 | 100% | 100% |
| AE                 | 100% | 100% |
| CI                 | -    | -    |
| Total              | 100% | 100% |
| Isoniazid          |      |      |
| I                  | 100% | 100% |
| MOA                | 100% | 100% |
| PK                 | 80%  | 100% |
| AE                 | 75%  | 100% |
| CI                 | -    | -    |

|                |      |      |
|----------------|------|------|
| Total          | 89%  | 100% |
| Lamotrigine    |      |      |
| I              | 100% | 100% |
| MOA            | 100% | 100% |
| PK             | 100% | 100% |
| AE             | 100% | 100% |
| CI             | -    | -    |
| Total          | 100% | 100% |
| Loperamide     |      |      |
| I              | 100% | 100% |
| MOA            | 100% | 100% |
| PK             | -    | -    |
| AE             | -    | -    |
| CI             | -    | -    |
| Total          | 100% | 100% |
| Metformin      |      |      |
| I              | 100% | 100% |
| MOA            | 100% | 100% |
| PK             | 100% | 100% |
| AE             | 100% | 100% |
| CI             | 100% | 100% |
| Total          | 100% | 100% |
| Methorexate    |      |      |
| I              | 80%  | 100% |
| MOA            | 100% | 100% |
| PK             | 80%  | 100% |
| AE             | 80%  | 100% |
| CI             | 100% | 100% |
| Total          | 85%  | 100% |
| Metoclopramide |      |      |
| I              | 100% | 100% |
| MOA            | 100% | 100% |
| PK             | 100% | 100% |
| AE             | 67%  | 100% |
| CI             | -    | -    |
| Total          | 92%  | 100% |
| Metoprolol     |      |      |
| I              | 100% | 100% |
| MOA            | 100% | 100% |
| PK             | 67%  | 100% |
| AE             | 100% | 100% |
| CI             | -    | -    |
| Total          | 92%  | 100% |
| Metronidazole  |      |      |
| I              | 100% | 100% |
| MOA            | 100% | 100% |
| PK             | 67%  | 100% |
| AE             | 100% | 100% |
| CI             | -    | -    |
| Total          | 92%  | 100% |
| Mirtazapine    |      |      |
| I              | 100% | 100% |
| MOA            | 100% | 100% |
| PK             | 100% | 100% |
| AE             | 100% | 100% |

|               |      |      |
|---------------|------|------|
| CI            | -    | -    |
| Total         | 100% | 100% |
| Morphine      |      |      |
| I             | 100% | 100% |
| MOA           | 100% | 100% |
| PK            | 100% | 100% |
| AE            | 78%  | 100% |
| CI            | 100% | 100% |
| Total         | 94%  | 100% |
| Nifedipine    |      |      |
| I             | 100% | 100% |
| MOA           | 25%  | 100% |
| PK            | -    | -    |
| AE            | -    | -    |
| CI            | -    | -    |
| Total         | 63%  | 100% |
| Omeprazole    |      |      |
| I             | 100% | 100% |
| MOA           | 100% | 100% |
| PK            | 75%  | 100% |
| AE            | 100% | 100% |
| CI            | -    | -    |
| Total         | 94%  | 100% |
| Paclitaxel    |      |      |
| I             | 100% | 100% |
| MOA           | 100% | 100% |
| PK            | -    | -    |
| AE            | 100% | 100% |
| CI            | -    | -    |
| Total         | 100% | 100% |
| Pancuronium   |      |      |
| I             | 100% | 100% |
| MOA           | 100% | 100% |
| PK            | 100% | 100% |
| AE            | 100% | 100% |
| CI            | -    | -    |
| Total         | 100% | 100% |
| Phenobarbital |      |      |
| I             | 100% | 100% |
| MOA           | 100% | 100% |
| PK            | 100% | 100% |
| AE            | 100% | 100% |
| CI            | 100% | 100% |
| Total         | 100% | 100% |
| Pilocarpine   |      |      |
| I             | 100% | 100% |
| MOA           | 100% | 100% |
| PK            | -    | -    |
| AE            | -    | -    |
| CI            | -    | -    |
| Total         | 100% | 100% |
| Piperacillin  |      |      |
| I             | 100% | 100% |
| MOA           | 100% | 100% |
| PK            | -    | -    |
| AE            | 100% | 100% |

|                          |      |      |
|--------------------------|------|------|
| CI                       | -    | -    |
| Total                    | 100% | 100% |
| Propofol                 |      |      |
| I                        | 100% | 100% |
| MOA                      | 100% | 100% |
| PK                       | 100% | 100% |
| AE                       | 100% | 100% |
| CI                       | -    | -    |
| Total                    | 100% | 100% |
| Ramipril                 |      |      |
| I                        | 100% | 100% |
| MOA                      | 100% | 100% |
| PK                       | -    | -    |
| AE                       | 100% | 100% |
| CI                       | -    | -    |
| Total                    | 100% | 100% |
| Ranitidine               |      |      |
| I                        | 100% | 100% |
| MOA                      | 100% | 100% |
| PK                       | 100% | 100% |
| AE                       | 67%  | 100% |
| CI                       | -    | -    |
| Total                    | 92%  | 100% |
| Rituximab                |      |      |
| I                        | 100% | 100% |
| MOA                      | 100% | 100% |
| PK                       | -    | -    |
| AE                       | 100% | 100% |
| CI                       | -    | -    |
| Total                    | 100% | 100% |
| Spironolactone           |      |      |
| I                        | 100% | 100% |
| MOA                      | 100% | 100% |
| PK                       | 100% | 100% |
| AE                       | 100% | 100% |
| CI                       | -    | -    |
| Total                    | 100% | 100% |
| Suxamethonium            |      |      |
| I                        | 100% | 100% |
| MOA                      | 100% | 100% |
| PK                       | 100% | 100% |
| AE                       | 100% | 100% |
| CI                       | -    | -    |
| Total                    | 100% | 100% |
| Thiamazole (Methimazole) |      |      |
| I                        | 100% | 100% |
| MOA                      | 100% | 100% |
| PK                       | 75%  | 100% |
| AE                       | 80%  | 100% |
| CI                       | -    | -    |
| Total                    | 89%  | 100% |
| Vancomycin               |      |      |
| I                        | 100% | 100% |
| MOA                      | 100% | 100% |
| PK                       | 100% | 100% |
| AE                       | 100% | 100% |

CI  
Total

-  
100%

-  
100%
