# Supplementary material for: Accuracy and Completeness of Drug Information in Wikipedia: A Comparison with Standard Textbooks of Pharmacology
Source: PubMed Central journal article supplement (PMC4174509; doi:10.1371/journal.pone.0106930), 2014-09-24
Supplement: pone.0106930.s003.pdf [file pone.0106930.s003.pdf]

Table S3: Qualitative evaluation of textbook information missing in the German Wikipedia.

| Textbook information not present in Wikipedia (keywords)             | Evaluation by lecturers (A-F)                             |   |   |   |   |   | sum | didactic relevance<br>(yes if sum > 4) |
|----------------------------------------------------------------------|-----------------------------------------------------------|---|---|---|---|---|-----|----------------------------------------|
|                                                                      | (1= didactically relevant; 0 = didactically not relevant) |   |   |   |   |   |     |                                        |
|                                                                      | A                                                         | B | C | D | E | F |     | result                                 |
| <b>Acetylsalicylic acid</b>                                          |                                                           |   |   |   |   |   |     |                                        |
| Acute coronary syndrome                                              | 1                                                         | 1 | 1 | 1 | 1 | 1 | 6   | yes                                    |
| Migraine attack                                                      | 1                                                         | 1 | 1 | 0 | 1 | 0 | 4   | no                                     |
| Inhibition of endothelial prostacyclin synthesis                     | 1                                                         | 1 | 0 | 0 | 1 | 1 | 4   | no                                     |
| CNS side effects (high doses)                                        | 0                                                         | 1 | 0 | 0 | 1 | 0 | 2   | no                                     |
| <b>Alendronic acid</b>                                               |                                                           |   |   |   |   |   |     |                                        |
| Osteoclast uptake                                                    | 1                                                         | 1 | 1 | 1 | 0 | 1 | 5   | yes                                    |
| <b>Allopurinol</b>                                                   |                                                           |   |   |   |   |   |     |                                        |
| Isomere of hypoxanthin                                               | 1                                                         | 0 | 1 | 0 | 0 | 1 | 3   | no                                     |
| Oral application                                                     | 0                                                         | 1 | 0 | 0 | 1 | 1 | 3   | no                                     |
| <b>Amoxicillin</b>                                                   |                                                           |   |   |   |   |   |     |                                        |
| H. influenzae infections                                             | 0                                                         | 1 | 1 | 1 | 0 | 1 | 4   | no                                     |
| High oral resorption when compared to Ampicillin                     | 1                                                         | 0 | 1 | 1 | 1 | 1 | 5   | yes                                    |
| <b>Atropine</b>                                                      |                                                           |   |   |   |   |   |     |                                        |
| Iridolysis                                                           | 0                                                         | 0 | 0 | 0 | 1 | 1 | 2   | no                                     |
| Mydriasis                                                            | 1                                                         | 1 | 0 | 1 | 1 | 1 | 5   | yes                                    |
| 50% renal elimination                                                | 0                                                         | 0 | 0 | 0 | 0 | 0 | 0   | no                                     |
| <b>Benzylpenicillin</b>                                              |                                                           |   |   |   |   |   |     |                                        |
| Neurotoxicity (high doses)                                           | 1                                                         | 1 | 0 | 0 | 1 | 0 | 3   | no                                     |
| <b>Biperiden</b>                                                     |                                                           |   |   |   |   |   |     |                                        |
| IND: M. Parkinson                                                    | 1                                                         | 1 | 1 | 1 | 1 | 1 | 6   | yes                                    |
| <b>Bromocriptine</b>                                                 |                                                           |   |   |   |   |   |     |                                        |
| Increased GH incretion                                               | 1                                                         | 0 | 1 | 0 | 0 | 1 | 3   | no                                     |
| Pleural fibrosis                                                     | 0                                                         | 0 | 0 | 1 | 1 | 1 | 3   | no                                     |
| <b>Caffeine</b>                                                      |                                                           |   |   |   |   |   |     |                                        |
| Increase of catecholamine levels                                     | 0                                                         | 1 | 1 | 0 | 1 | 1 | 4   | no                                     |
| Interactions with uric acid metabolism                               | 0                                                         | 0 | 0 | 0 | 0 | 0 | 0   | no                                     |
| Tremor                                                               | 1                                                         | 1 | 1 | 0 | 1 | 1 | 5   | yes                                    |
| Seizures                                                             | 1                                                         | 1 | 0 | 1 | 1 | 1 | 5   | yes                                    |
| Anxiety                                                              | 0                                                         | 1 | 0 | 0 | 0 | 1 | 2   | no                                     |
| Increased gastric acid production                                    | 1                                                         | 1 | 1 | 0 | 0 | 1 | 4   | no                                     |
| <b>Candesartan</b>                                                   |                                                           |   |   |   |   |   |     |                                        |
| Long duration of action                                              | 1                                                         | 1 | 0 | 0 | 1 | 0 | 3   | no                                     |
| <b>Carbamazepine</b>                                                 |                                                           |   |   |   |   |   |     |                                        |
| Use-dependent block of neuronal discharges                           | 1                                                         | 0 | 1 | 1 | 0 | 1 | 4   | no                                     |
| <b>Cefepime</b>                                                      |                                                           |   |   |   |   |   |     |                                        |
| IND: Pseudomonde infections                                          | 1                                                         | 1 | 1 | 1 | 1 | 1 | 6   | yes                                    |
| IND: infections with gram negative bacteria                          | 1                                                         | 1 | 1 | 1 | 1 | 1 | 6   | yes                                    |
| IND: infections with gram positive bacteria                          | 1                                                         | 1 | 0 | 1 | 1 | 1 | 5   | yes                                    |
| <b>Ciclosporin</b>                                                   |                                                           |   |   |   |   |   |     |                                        |
| IND: autoimmune disorders, rheumatoide arthritis                     | 1                                                         | 0 | 1 | 1 | 1 | 1 | 5   | yes                                    |
| Variable oral bioavailability                                        | 1                                                         | 1 | 1 | 1 | 0 | 1 | 5   | yes                                    |
| Predominant hepatic biotransformation                                | 1                                                         | 1 | 0 | 1 | 1 | 1 | 5   | yes                                    |
| Predominant hepatic elimination                                      | 0                                                         | 0 | 0 | 0 | 0 | 1 | 1   | no                                     |
| Hyperglycemia                                                        | 0                                                         | 0 | 0 | 1 | 0 | 1 | 2   | no                                     |
| <b>Ciprofloxacin</b>                                                 |                                                           |   |   |   |   |   |     |                                        |
| Inhibition of topoisomerase II                                       | 1                                                         | 1 | 1 | 0 | 0 | 1 | 4   | no                                     |
| Renal elimination                                                    | 1                                                         | 0 | 0 | 0 | 1 | 1 | 3   | no                                     |
| CNS adverse effects                                                  | 1                                                         | 0 | 0 | 0 | 1 | 0 | 2   | no                                     |
| <b>Clarithromycin</b>                                                |                                                           |   |   |   |   |   |     |                                        |
| Alternative antibiotic for patients with penicillin allergy          | 1                                                         | 1 | 0 | 1 | 0 | 1 | 4   | no                                     |
| <b>Cyclophosphamide</b>                                              |                                                           |   |   |   |   |   |     |                                        |
| Immunosuppressive effect via inhibition of leucocytes                | 1                                                         | 0 | 1 | 1 | 1 | 1 | 5   | yes                                    |
| <b>Diazepam</b>                                                      |                                                           |   |   |   |   |   |     |                                        |
| Dose-dependent anxiolytic, sedative, myotonolytic or anti-convulsant | 1                                                         | 1 | 1 | 1 | 1 | 1 | 6   | yes                                    |
| conjugation of hydroxyl group during biotransformation               | 0                                                         | 0 | 0 | 0 | 0 | 0 | 0   | no                                     |
| Reduced / slowed elimination in liver disease                        | 1                                                         | 0 | 1 | 1 | 0 | 1 | 4   | no                                     |
| Floppy infant syndrom                                                | 1                                                         | 1 | 0 | 1 | 1 | 1 | 5   | yes                                    |
| Reduced libido                                                       | 0                                                         | 0 | 0 | 0 | 0 | 1 | 1   | no                                     |
| <b>Domperidone</b>                                                   |                                                           |   |   |   |   |   |     |                                        |
| IND: migraine attacks                                                | 0                                                         | 1 | 0 | 0 | 1 | 1 | 3   | no                                     |
| Reflux                                                               | 1                                                         | 0 | 0 | 0 | 1 | 0 | 2   | no                                     |
| <b>Doxazosin</b>                                                     |                                                           |   |   |   |   |   |     |                                        |
| Tachycardia                                                          | 1                                                         | 1 | 0 | 0 | 1 | 1 | 4   | no                                     |
| Increased heart failure incidence                                    | 0                                                         | 1 | 1 | 1 | 1 | 1 | 5   | yes                                    |

|                                                      |   |   |   |   |   |   |   |     |
|------------------------------------------------------|---|---|---|---|---|---|---|-----|
| <b>Doxycycline</b>                                   |   |   |   |   |   |   |   |     |
| IND: Proprii bacteria infections                     | 0 | 1 | 0 | 1 | 0 | 1 | 3 | no  |
| IND: Yersinia infections                             | 0 | 0 | 0 | 1 | 0 | 1 | 2 | no  |
| IND: Protozoa infections                             | 0 | 0 | 0 | 1 | 0 | 1 | 2 | no  |
| IND: Lymphgranuloma venerum                          | 0 | 0 | 0 | 0 | 0 | 1 | 1 | no  |
| Penetrates blood-placenta-barrier                    | 0 | 1 | 0 | 1 | 1 | 1 | 4 | no  |
| Variable penetration of blood-brain-barrier          | 0 | 0 | 0 | 0 | 0 | 1 | 1 | no  |
| Plasma protein binding 90%                           | 0 | 0 | 0 | 0 | 0 | 0 | 0 | no  |
| Onycholysis                                          | 0 | 0 | 0 | 0 | 0 | 1 | 1 | no  |
| Increase of intracranial pressure                    | 0 | 0 | 0 | 0 | 0 | 1 | 1 | no  |
| Esophageal mucositis                                 | 0 | 1 | 0 | 1 | 0 | 0 | 2 | no  |
| <b>Estradiol</b>                                     |   |   |   |   |   |   |   |     |
| IND: hormone therapy in menopause                    | 1 | 1 | 1 | 1 | 1 | 1 | 6 | yes |
| Binding to estradiol response element                | 1 | 0 | 0 | 1 | 1 | 1 | 4 | no  |
| Suppression of ovulation                             | 1 | 1 | 0 | 1 | 1 | 1 | 5 | yes |
| Higher oral dose                                     | 0 | 1 | 0 | 0 | 0 | 0 | 1 | no  |
| Hepatic elimination                                  | 1 | 1 | 0 | 1 | 1 | 0 | 4 | no  |
| Elimination product estriol                          | 0 | 0 | 0 | 0 | 0 | 1 | 1 | no  |
| Glucuronidation, sulphation                          | 0 | 1 | 0 | 1 | 0 | 1 | 3 | no  |
| Role of renal elimination                            | 1 | 1 | 0 | 0 | 0 | 1 | 3 | no  |
| Transdermal application                              | 1 | 1 | 1 | 1 | 1 | 1 | 6 | yes |
| Thrombosis                                           | 1 | 1 | 1 | 1 | 1 | 1 | 6 | yes |
| Endometrial carcinoma                                | 1 | 1 | 1 | 1 | 1 | 1 | 5 | yes |
| Edema                                                | 1 | 1 | 1 | 1 | 0 | 1 | 5 | yes |
| Cardiovascular complications                         | 1 | 1 | 1 | 1 | 1 | 1 | 6 | yes |
| <b>Ethanol</b>                                       |   |   |   |   |   |   |   |     |
| Increase in blood pressure                           | 0 | 1 | 0 | 0 | 1 | 0 | 2 | no  |
| Hypoglycemia                                         | 1 | 1 | 1 | 0 | 1 | 0 | 4 | no  |
| Increased diuresis                                   | 1 | 1 | 0 | 1 | 0 | 1 | 4 | no  |
| Decreased sexual potency                             | 1 | 1 | 0 | 0 | 0 | 1 | 3 | no  |
| Distribution in total body water                     | 0 | 1 | 0 | 1 | 1 | 1 | 4 | no  |
| Elimination increased in alcoholics                  | 1 | 1 | 0 | 0 | 0 | 1 | 3 | no  |
| CYP450 metabolism                                    | 0 | 1 | 0 | 1 | 0 | 0 | 2 | no  |
| Energy source                                        | 1 | 1 | 0 | 1 | 1 | 1 | 5 | yes |
| <b>Flucloxacillin</b>                                |   |   |   |   |   |   |   |     |
| Effectiveness against penicilline-sensitive bacteria | 0 | 1 | 0 | 1 | 1 | 1 | 4 | no  |
| Oral application                                     | 1 | 1 | 0 | 1 | 1 | 1 | 5 | yes |
| Half-life 30 bis 60 min                              | 0 | 0 | 0 | 0 | 0 | 0 | 0 | no  |
| High plasma protein binding                          | 0 | 0 | 0 | 0 | 0 | 0 | 0 | no  |
| <b>Fluconazole</b>                                   |   |   |   |   |   |   |   |     |
| High water solubility                                | 0 | 1 | 0 | 0 | 0 | 0 | 1 | no  |
| Application oral or i.v.                             | 1 | 1 | 0 | 1 | 1 | 1 | 5 | yes |
| Oral bioavailability > 90%                           | 0 | 1 | 0 | 1 | 0 | 1 | 3 | no  |
| High liquor concentration                            | 1 | 1 | 0 | 1 | 1 | 1 | 5 | yes |
| Half-life 30 h                                       | 1 | 1 | 0 | 1 | 0 | 0 | 3 | no  |
| Mainly unmodified renal elimination                  | 1 | 1 | 0 | 0 | 1 | 1 | 4 | no  |
| Dose adaption in renal insufficiency                 | 1 | 1 | 1 | 1 | 1 | 1 | 6 | yes |
| <b>Flumazenil</b>                                    |   |   |   |   |   |   |   |     |
| Half-life 1 h                                        | 1 | 1 | 0 | 0 | 0 | 0 | 2 | no  |
| <b>Furosemide</b>                                    |   |   |   |   |   |   |   |     |
| Effective if GFR <30 ml/min                          | 1 | 1 | 1 | 1 | 1 | 1 | 6 | yes |
| Increased thrombosis risk                            | 1 | 1 | 1 | 1 | 1 | 1 | 6 | yes |
| <b>Gentamicin</b>                                    |   |   |   |   |   |   |   |     |
| Intracellular site of action                         | 0 | 0 | 0 | 0 | 0 | 1 | 1 | no  |
| No penetration of blood-liquor-barrier               | 1 | 1 | 1 | 0 | 1 | 1 | 4 | no  |
| Low plasma protein binding                           | 0 | 1 | 0 | 0 | 0 | 0 | 1 | no  |
| No metabolism                                        | 1 | 1 | 0 | 0 | 0 | 1 | 3 | no  |
| Renal elimination by glomerular filtration           | 1 | 1 | 0 | 1 | 1 | 1 | 5 | yes |
| Reduced elimination in renal insufficiency           | 1 | 1 | 1 | 1 | 1 | 1 | 6 | yes |
| CI: pregnancy                                        | 1 | 1 | 0 | 1 | 1 | 1 | 4 | no  |
| <b>Glyceryl trinitrate</b>                           |   |   |   |   |   |   |   |     |
| Duration of action 15-30 min                         | 1 | 1 | 1 | 0 | 1 | 1 | 5 | yes |
| <b>Goserelin</b>                                     |   |   |   |   |   |   |   |     |
| Regulation of GnRH-receptors                         | 0 | 1 | 0 | 1 | 1 | 1 | 4 | no  |
| Reduction of sex hormone levels                      | 1 | 1 | 1 | 1 | 1 | 1 | 6 | yes |
| Hot flush                                            | 1 | 1 | 1 | 1 | 1 | 1 | 6 | yes |
| <b>Heparin, unfractionated</b>                       |   |   |   |   |   |   |   |     |
| Tissue irritation at injection site                  | 0 | 0 | 0 | 0 | 0 | 1 | 1 | no  |
| <b>Hydrochlorothiazide</b>                           |   |   |   |   |   |   |   |     |
| Hypercalciuria                                       | 0 | 1 | 0 | 1 | 1 | 1 | 4 | no  |
| Onset of action after 1-2 h                          | 0 | 1 | 0 | 0 | 1 | 0 | 2 | no  |
| Loss of action if renal function is reduced          | 0 | 1 | 1 | 1 | 1 | 1 | 5 | yes |
| <b>Ibuprofen</b>                                     |   |   |   |   |   |   |   |     |
| Oxidation as biotransformation process               | 0 | 0 | 0 | 0 | 0 | 0 | 0 | no  |
| <b>Imipenem</b>                                      |   |   |   |   |   |   |   |     |
| Beta-lactamase stable                                | 1 | 1 | 1 | 1 | 1 | 1 | 6 | yes |
| <b>Insulin lispro</b>                                |   |   |   |   |   |   |   |     |
| Duration of action 2 h                               | 1 | 1 | 0 | 0 | 1 | 1 | 4 | no  |
| Max. drug action after 40 min                        | 1 | 1 | 0 | 0 | 1 | 1 | 4 | no  |

|                                                                         |   |   |   |   |   |   |   |     |
|-------------------------------------------------------------------------|---|---|---|---|---|---|---|-----|
| <b>Isoflurane</b>                                                       |   |   |   |   |   |   |   |     |
| MAC-value 1.2%                                                          | 0 | 1 | 0 | 0 | 1 | 0 | 2 | no  |
| Metabolisation 0.2%                                                     | 0 | 1 | 0 | 1 | 0 | 1 | 3 | no  |
| Quick onset of drug action                                              | 1 | 1 | 0 | 0 | 1 | 1 | 4 | no  |
| <b>Isoniazid</b>                                                        |   |   |   |   |   |   |   |     |
| High tissue distribution                                                | 1 | 1 | 0 | 1 | 1 | 1 | 5 | yes |
| <b>Lamotrigine</b>                                                      |   |   |   |   |   |   |   |     |
| IND: focal seizures                                                     | 1 | 1 | 1 | 1 | 0 | 1 | 5 | yes |
| IND: Lennox-Gastaut-syndrome                                            | 0 | 0 | 0 | 1 | 1 | 0 | 2 | no  |
| <b>Levodopa</b>                                                         |   |   |   |   |   |   |   |     |
| Metabolization to dopamin by dopa-decarboxylase                         | 1 | 1 | 1 | 1 | 1 | 1 | 6 | yes |
| Loss of efficacy after longtime use                                     | 1 | 1 | 0 | 1 | 1 | 1 | 5 | yes |
| <b>Lithium</b>                                                          |   |   |   |   |   |   |   |     |
| Hyperthyreotic metabolic state                                          | 0 | 1 | 0 | 0 | 0 | 1 | 2 | no  |
| Therapeutic effect after 1-2 weeks                                      | 1 | 1 | 1 | 1 | 1 | 1 | 6 | yes |
| Prophylactic effects after 6-12 months                                  | 1 | 1 | 1 | 1 | 1 | 1 | 6 | yes |
| Maximal plasma concentration after 2 h                                  | 0 | 1 | 0 | 0 | 0 | 0 | 1 | no  |
| Euthyret struma                                                         | 1 | 1 | 1 | 1 | 1 | 1 | 6 | yes |
| ECG abnormalities                                                       | 1 | 1 | 0 | 1 | 1 | 1 | 5 | yes |
| Renal diabetes insipidus                                                | 1 | 1 | 0 | 1 | 1 | 1 | 5 | yes |
| <b>Loperamide</b>                                                       |   |   |   |   |   |   |   |     |
| Inhibition of propulsive peristalsis                                    | 1 | 1 | 1 | 1 | 1 | 1 | 6 | yes |
| Reduction of fluid loss                                                 | 1 | 1 | 1 | 1 | 1 | 1 | 6 | yes |
| CNS AE in children                                                      | 1 | 1 | 1 | 1 | 1 | 1 | 6 | yes |
| <b>Metformin</b>                                                        |   |   |   |   |   |   |   |     |
| Unmodified renal elimination                                            | 1 | 1 | 1 | 0 | 1 | 1 | 5 | yes |
| Half-life 2-5 h                                                         | 0 | 1 | 0 | 0 | 0 | 0 | 1 | no  |
| Caution if used in elderly patients                                     | 1 | 1 | 1 | 1 | 0 | 0 | 4 | no  |
| <b>Methotrexate</b>                                                     |   |   |   |   |   |   |   |     |
| Direct inhibition of enzymes                                            | 1 | 1 | 0 | 0 | 1 | 0 | 3 | no  |
| Drug resistance                                                         | 0 | 1 | 0 | 0 | 1 | 0 | 2 | no  |
| <b>Metoclopramide</b>                                                   |   |   |   |   |   |   |   |     |
| Antiemetic effect                                                       | 1 | 1 | 1 | 1 | 1 | 1 | 6 | yes |
| Increased tonus of lower esophagus sphincter                            | 1 | 1 | 0 | 1 | 1 | 1 | 5 | yes |
| Higher risk for AE in children                                          | 1 | 1 | 0 | 1 | 1 | 0 | 4 | no  |
| <b>Metoprolol</b>                                                       |   |   |   |   |   |   |   |     |
| Blood pressure reduction after weeks                                    | 1 | 1 | 0 | 0 | 1 | 1 | 4 | no  |
| <b>Metronidazole</b>                                                    |   |   |   |   |   |   |   |     |
| HP triple therapy                                                       | 1 | 1 | 1 | 0 | 0 | 0 | 3 | no  |
| <b>Mirtazapine</b>                                                      |   |   |   |   |   |   |   |     |
| Agitated depression                                                     | 1 | 0 | 0 | 0 | 0 | 0 | 1 | no  |
| <b>Morphine</b>                                                         |   |   |   |   |   |   |   |     |
| Sedation                                                                | 1 | 1 | 1 | 1 | 1 | 1 | 6 | yes |
| Oral bioavailability 15%                                                | 1 | 1 | 0 | 1 | 1 | 1 | 5 | yes |
| Hepatic glucuronidation                                                 | 1 | 0 | 0 | 0 | 0 | 0 | 1 | no  |
| Half-life: several hours                                                | 1 | 0 | 1 | 0 | 0 | 1 | 3 | no  |
| AE: increased GI-tonus                                                  | 1 | 1 | 1 | 1 | 1 | 1 | 6 | yes |
| AE: bradycardia                                                         | 0 | 1 | 0 | 1 | 1 | 1 | 4 | no  |
| AE: miosis                                                              | 1 | 1 | 0 | 1 | 1 | 1 | 5 | yes |
| AE: effect on hypophyseal hormones                                      | 0 | 0 | 0 | 1 | 1 | 1 | 3 | no  |
| AE: delayed gastric emptying                                            | 0 | 1 | 0 | 1 | 1 | 1 | 4 | no  |
| AE: spastic constipation                                                | 1 | 1 | 1 | 1 | 1 | 1 | 6 | yes |
| CI: lung diseases                                                       | 0 | 0 | 0 | 0 | 1 | 0 | 1 | no  |
| Use during birth                                                        | 1 | 0 | 0 | 1 | 1 | 1 | 4 | no  |
| <b>Naloxone</b>                                                         |   |   |   |   |   |   |   |     |
| Use in neonatal medicine                                                | 0 | 1 | 0 | 0 | 1 | 0 | 2 | no  |
| Half-life approx. 1 h                                                   | 1 | 1 | 1 | 0 | 1 | 0 | 4 | no  |
| <b>Nifedipine</b>                                                       |   |   |   |   |   |   |   |     |
| Rapid onset of action                                                   | 1 | 1 | 1 | 1 | 1 | 1 | 6 | yes |
| Oral bioavailability 50%                                                | 0 | 1 | 0 | 0 | 0 | 0 | 1 | no  |
| Half-life 2 h                                                           | 1 | 1 | 0 | 0 | 0 | 0 | 2 | no  |
| <b>Nicotine</b>                                                         |   |   |   |   |   |   |   |     |
| Intoxication: excitation, followed by depolarisation block              | 1 | 1 | 0 | 1 | 1 | 1 | 5 | yes |
| Absorption pH-dependent                                                 | 0 | 1 | 0 | 1 | 0 | 0 | 2 | no  |
| Elimination: 10% unmodified renal elimination                           | 0 | 1 | 0 | 1 | 0 | 0 | 2 | no  |
| Increase of plasma lipids                                               | 1 | 0 | 0 | 1 | 1 | 1 | 4 | no  |
| GI-ulcera                                                               | 1 | 0 | 0 | 0 | 1 | 1 | 3 | no  |
| <b>Norepinephrine</b>                                                   |   |   |   |   |   |   |   |     |
| $\alpha_2$ -mediated inhibition of noradrenalin release                 | 1 | 1 | 1 | 0 | 1 | 1 | 5 | yes |
| Effect on $\beta_2$ receptors                                           | 0 | 1 | 0 | 1 | 1 | 1 | 4 | no  |
| Renale elimination                                                      | 1 | 1 | 0 | 0 | 0 | 1 | 3 | no  |
| <b>Omeprazole</b>                                                       |   |   |   |   |   |   |   |     |
| Duration of action until re-synthesis of proton pump                    | 1 | 1 | 1 | 0 | 1 | 1 | 5 | yes |
| Duration of action > half-time (irreversible inhibition of proton pump) | 1 | 1 | 0 | 0 | 1 | 1 | 4 | no  |
| Hypergastrinemia                                                        | 1 | 0 | 0 | 0 | 1 | 0 | 2 | no  |

|                                                                             |   |   |   |   |   |   |   |     |
|-----------------------------------------------------------------------------|---|---|---|---|---|---|---|-----|
| <b>Ondansetron</b>                                                          |   |   |   |   |   |   |   |     |
| Co-medication with steroids results in increased efficacy                   | 0 | 1 | 1 | 1 | 1 | 1 | 5 | yes |
| Half-life 3.5 h                                                             | 0 | 0 | 0 | 0 | 0 | 0 | 0 | no  |
| Duration several hours                                                      | 0 | 0 | 0 | 1 | 1 | 1 | 3 | no  |
| <b>Pancuronium</b>                                                          |   |   |   |   |   |   |   |     |
| IND: intoxications with elevated muscle tension                             | 1 | 0 | 0 | 0 | 1 | 1 | 3 | no  |
| <b>Perchlorate</b>                                                          |   |   |   |   |   |   |   |     |
| Aplastic anemia                                                             | 1 | 1 | 1 | 1 | 1 | 0 | 5 | yes |
| <b>Physostigmine</b>                                                        |   |   |   |   |   |   |   |     |
| Carbamylation of ACh-esterase                                               | 0 | 0 | 1 | 0 | 0 | 0 | 1 | no  |
| <b>Pilocarpine</b>                                                          |   |   |   |   |   |   |   |     |
| Accommodation errors                                                        | 1 | 1 | 0 | 1 | 1 | 1 | 5 | yes |
| Reduced twilight vision                                                     | 0 | 1 | 0 | 1 | 1 | 1 | 4 | no  |
| Systemic actions                                                            | 0 | 0 | 0 | 0 | 1 | 1 | 2 | no  |
| <b>Prednisolone</b>                                                         |   |   |   |   |   |   |   |     |
| IND: leucemia                                                               | 1 | 1 | 1 | 1 | 1 | 0 | 5 | yes |
| Decreased cytokine synthesis                                                | 1 | 1 | 1 | 1 | 1 | 1 | 6 | yes |
| Inhibition of all inflammation phases                                       | 1 | 0 | 1 | 1 | 1 | 1 | 5 | yes |
| Negative feedback mechanisms                                                | 1 | 1 | 1 | 1 | 1 | 1 | 6 | yes |
| Affinity to mineral corticoid receptor                                      | 1 | 1 | 1 | 1 | 1 | 1 | 6 | yes |
| Oral application                                                            | 0 | 1 | 0 | 0 | 1 | 1 | 3 | no  |
| Glucuronidation, sulphatation                                               | 0 | 1 | 0 | 0 | 0 | 0 | 1 | no  |
| Sodium retention, potassium excretion via mineral corticoid receptor action | 1 | 1 | 1 | 0 | 1 | 1 | 5 | yes |
| Muscle weakness                                                             | 1 | 1 | 0 | 1 | 1 | 1 | 5 | yes |
| Euphoria                                                                    | 1 | 1 | 1 | 1 | 1 | 1 | 6 | yes |
| Adrenal cortex atrophy                                                      | 1 | 1 | 1 | 1 | 1 | 1 | 6 | yes |
| Glaucoma, cataract                                                          | 0 | 1 | 1 | 1 | 1 | 1 | 5 | yes |
| Cl: osteoporosis                                                            | 1 | 1 | 1 | 1 | 1 | 1 | 6 | yes |
| Cl: GI-ulcers                                                               | 1 | 1 | 1 | 1 | 1 | 1 | 6 | yes |
| Cl: hypertonus                                                              | 1 | 1 | 1 | 0 | 1 | 1 | 5 | yes |
| Cl: diabetes mellitus                                                       | 1 | 1 | 0 | 1 | 1 | 1 | 5 | yes |
| Cl: infectious diseases                                                     | 1 | 1 | 1 | 1 | 1 | 1 | 6 | yes |
| Cl: pregnancy                                                               | 1 | 1 | 0 | 1 | 1 | 1 | 5 | yes |
| <b>Propofol</b>                                                             |   |   |   |   |   |   |   |     |
| Drug action after 1 min                                                     | 0 | 1 | 0 | 0 | 1 | 1 | 3 | no  |
| Duration of action 10 min                                                   | 1 | 1 | 0 | 0 |   | 1 | 3 | no  |
| Half-time 30 min                                                            | 0 | 1 | 0 | 0 |   | 0 | 1 | no  |
| Hepatic metabolisation                                                      | 1 | 1 | 0 | 0 | 0 | 1 | 3 | no  |
| <b>Pyrazinamide</b>                                                         |   |   |   |   |   |   |   |     |
| Inhibition of fatty acid synthesis by pyrazincarbonate acid                 | 0 | 0 | 0 | 0 | 0 | 0 | 0 | no  |
| Inhibition of mycolic acid synthesis                                        | 1 | 1 | 1 | 1 | 1 | 1 | 6 | yes |
| High tissue distribution                                                    | 0 | 1 | 0 | 0 |   | 1 | 2 | no  |
| <b>Ranitidine</b>                                                           |   |   |   |   |   |   |   |     |
| Dizziness                                                                   | 1 | 0 | 0 | 0 | 1 | 1 | 3 | no  |
| <b>Rifampicin</b>                                                           |   |   |   |   |   |   |   |     |
| Application p.o.                                                            | 0 | 1 | 0 | 0 | 0 | 1 | 2 | no  |
| Plasma protein binding 80%                                                  | 0 | 1 | 0 | 0 | 0 | 0 | 1 | no  |
| High organ distribution                                                     | 1 | 1 | 0 | 1 | 0 | 1 | 4 | no  |
| Half-life 2-5 h                                                             | 0 | 1 | 0 | 0 | 0 | 0 | 1 | no  |
| After longtime use reduction of half-life                                   | 0 | 1 | 0 | 1 | 1 | 1 | 4 | no  |
| GI-tract side effects                                                       | 0 | 1 | 0 | 0 | 1 | 1 | 3 | no  |
| Adverse effects of the skin                                                 | 1 | 1 | 0 | 0 | 1 | 1 | 4 | no  |
| Neurological side effects                                                   | 1 | 0 | 0 | 0 | 0 | 1 | 2 | no  |
| Flu symptoms                                                                | 0 | 1 | 0 | 0 | 1 | 1 | 3 | no  |
| Use in pregnancy                                                            | 0 | 1 | 0 | 0 | 1 | 1 | 3 | no  |
| Use during lactation                                                        | 0 | 1 | 0 | 0 | 1 | 1 | 3 | no  |
| <b>Suxamethonium</b>                                                        |   |   |   |   |   |   |   |     |
| Blockade of action potentials                                               | 1 | 1 | 0 | 0 | 1 | 1 | 4 | no  |
| Longlasting paralysis                                                       | 1 | 1 | 0 | 1 | 1 | 0 | 4 | no  |
| <b>Tazobactam</b>                                                           |   |   |   |   |   |   |   |     |
| IND: Severe infections                                                      | 0 | 1 | 0 | 0 | 1 | 1 | 3 | no  |
| <b>Thiamazole (Methimazole)</b>                                             |   |   |   |   |   |   |   |     |
| Inhibition of iodine incorporation to tyrosines                             | 1 | 1 | 1 | 0 | 1 | 1 | 5 | yes |
| Delayed thyreostatic effect                                                 | 1 | 1 | 1 | 1 | 1 | 1 | 6 | yes |
| <b>Valproic acid</b>                                                        |   |   |   |   |   |   |   |     |
| IND: focal seizures                                                         | 1 | 0 | 1 | 1 | 0 | 1 | 4 | no  |
| Inhibition of T-type-calcium channels                                       | 0 | 0 | 0 | 0 | 0 | 1 | 1 | no  |
| High plasma protein binding                                                 | 1 | 1 | 0 | 1 | 0 | 0 | 3 | no  |
| <b>Vancomycin</b>                                                           |   |   |   |   |   |   |   |     |
| No penetration of outer membrane in gram negative bacteria                  | 0 | 0 | 1 | 1 | 1 | 1 | 4 | no  |
| No hemodialysis                                                             | 0 | 0 | 0 | 1 | 0 | 0 | 1 | no  |
| Irritation of veins after i.v. application                                  | 0 | 1 | 0 | 1 | 1 | 1 | 4 | no  |
