# Supplementary material for: Accuracy and Completeness of Drug Information in Wikipedia: A Comparison with Standard Textbooks of Pharmacology
Source: PubMed Central journal article supplement (PMC4174509; doi:10.1371/journal.pone.0106930), 2014-09-24
Supplement: pone.0106930.s004.pdf [file pone.0106930.s004.pdf]

**Table S4: Proportion of references per drug article in Wikipedia.**

| <b>German Wikipedia</b> | <b>A</b> | <b>B</b> | <b>C</b> | <b>D</b> | <b>E</b> | <b>F</b> | <b>G</b> |
|-------------------------|----------|----------|----------|----------|----------|----------|----------|
| Acetylsalicylic acid    | 0.42     | 0.22     | 0.05     | 0.07     | 0.00     | 0.13     | 0.11     |
| Aciclovir               | 0.18     | 0.45     | 0.00     | 0.00     | 0.00     | 0.27     | 0.09     |
| Alendronic acid         | 0.00     | 0.00     | 0.00     | 0.00     | 0.00     | 1.00     | 0.00     |
| Allopurinol             | 0.11     | 0.00     | 0.11     | 0.00     | 0.00     | 0.78     | 0.00     |
| Amantadine              | 0.17     | 0.17     | 0.08     | 0.08     | 0.00     | 0.33     | 0.17     |
| Amiodarone              | 0.33     | 0.33     | 0.05     | 0.00     | 0.00     | 0.29     | 0.00     |
| Amitriptyline           | 0.44     | 0.06     | 0.13     | 0.00     | 0.00     | 0.38     | 0.00     |
| Amoxicillin             | 0.00     | 0.00     | 0.00     | 0.50     | 0.00     | 0.50     | 0.00     |
| Atropine                | 0.33     | 0.33     | 0.00     | 0.00     | 0.00     | 0.33     | 0.00     |
| Azathioprine            | 0.08     | 0.17     | 0.00     | 0.08     | 0.00     | 0.42     | 0.25     |
| Benzylpenicillin        | 0.08     | 0.38     | 0.00     | 0.00     | 0.00     | 0.54     | 0.00     |
| Biperiden               | 0.20     | 0.40     | 0.00     | 0.00     | 0.00     | 0.40     | 0.00     |
| Bromocriptine           | 0.20     | 0.20     | 0.00     | 0.00     | 0.00     | 0.60     | 0.00     |
| Buprenorphine           | 0.58     | 0.22     | 0.03     | 0.00     | 0.00     | 0.11     | 0.06     |
| Caffeine                | 0.46     | 0.17     | 0.04     | 0.12     | 0.00     | 0.19     | 0.02     |
| Candesartan             | 0.00     | 0.17     | 0.00     | 0.00     | 0.00     | 0.83     | 0.00     |
| Carbamazepine           | 0.14     | 0.14     | 0.14     | 0.07     | 0.00     | 0.36     | 0.14     |
| Cefepime                | 0.50     | 0.00     | 0.25     | 0.00     | 0.00     | 0.25     | 0.00     |
| Ciclosporin             | 0.22     | 0.11     | 0.00     | 0.00     | 0.00     | 0.56     | 0.11     |
| Ciprofloxacin           | 0.37     | 0.16     | 0.00     | 0.00     | 0.00     | 0.47     | 0.00     |
| Clarithromycin          | 0.00     | 0.20     | 0.20     | 0.10     | 0.00     | 0.50     | 0.00     |
| Clopidogrel             | 0.32     | 0.13     | 0.35     | 0.03     | 0.00     | 0.16     | 0.00     |
| Cocaine                 | 0.13     | 0.21     | 0.30     | 0.13     | 0.00     | 0.11     | 0.13     |
| Cyclophosphamide        | 0.09     | 0.27     | 0.09     | 0.00     | 0.00     | 0.55     | 0.00     |
| Diazepam                | 0.19     | 0.19     | 0.05     | 0.00     | 0.00     | 0.48     | 0.10     |
| Digoxin                 | 0.22     | 0.00     | 0.00     | 0.33     | 0.00     | 0.44     | 0.00     |
| Domperidone             | 0.00     | 0.33     | 0.33     | 0.00     | 0.00     | 0.33     | 0.00     |
| Doxazosin               | 0.00     | 0.40     | 0.00     | 0.00     | 0.00     | 0.60     | 0.00     |
| Doxycycline             | 0.00     | 0.40     | 0.10     | 0.00     | 0.00     | 0.50     | 0.00     |
| Enoxaparin sodium       | 0.50     | 0.08     | 0.08     | 0.00     | 0.00     | 0.25     | 0.08     |
| Epinephrine             | 0.20     | 0.30     | 0.20     | 0.00     | 0.00     | 0.30     | 0.00     |
| Estradiol               | 0.17     | 0.17     | 0.00     | 0.17     | 0.00     | 0.50     | 0.00     |
| Ethambutol              | 0.40     | 0.20     | 0.00     | 0.00     | 0.00     | 0.40     | 0.00     |
| Ethanol                 | 0.16     | 0.49     | 0.09     | 0.06     | 0.01     | 0.09     | 0.10     |
| Exenatide               | 0.44     | 0.00     | 0.22     | 0.11     | 0.00     | 0.22     | 0.00     |
| Finasteride             | 0.30     | 0.17     | 0.17     | 0.00     | 0.00     | 0.17     | 0.17     |
| Flucloxacillin          | 0.33     | 0.67     | 0.00     | 0.00     | 0.00     | 0.00     | 0.00     |
| Fluconazole             | 0.17     | 0.17     | 0.00     | 0.00     | 0.00     | 0.67     | 0.00     |
| Flumazenil              | 0.20     | 0.40     | 0.00     | 0.00     | 0.00     | 0.40     | 0.00     |
| Furosemide              | 0.20     | 0.00     | 0.60     | 0.00     | 0.00     | 0.00     | 0.20     |
| Gentamicin              | 0.56     | 0.19     | 0.00     | 0.25     | 0.00     | 0.00     | 0.00     |
| Glyceryl trinitrate     | 0.19     | 0.38     | 0.00     | 0.00     | 0.00     | 0.38     | 0.06     |

|                     |      |      |      |      |      |      |      |
|---------------------|------|------|------|------|------|------|------|
| Goserelin           | 0.60 | 0.00 | 0.00 | 0.00 | 0.40 | 0.00 | 0.00 |
| Haloperidol         | 0.38 | 0.15 | 0.00 | 0.00 | 0.00 | 0.38 | 0.08 |
| Heparin             | 0.00 | 0.38 | 0.08 | 0.00 | 0.00 | 0.54 | 0.00 |
| Hydrochlorothiazide | 0.00 | 0.50 | 0.10 | 0.00 | 0.10 | 0.30 | 0.00 |
| Ibuprofen           | 0.40 | 0.16 | 0.00 | 0.08 | 0.00 | 0.24 | 0.12 |
| Imipenem            | 0.00 | 0.00 | 0.00 | 0.00 | 0.00 | 1.00 | 0.00 |
| Insulin lispro      | 0.50 | 0.50 | 0.00 | 0.00 | 0.00 | 0.00 | 0.00 |
| Isoflurane          | 0.00 | 0.50 | 0.00 | 0.00 | 0.00 | 0.50 | 0.00 |
| Isoniazid           | 0.40 | 0.20 | 0.00 | 0.00 | 0.00 | 0.40 | 0.00 |
| Lamotrigine         | 0.54 | 0.08 | 0.00 | 0.00 | 0.00 | 0.31 | 0.08 |
| Levodopa            | 0.33 | 0.22 | 0.22 | 0.00 | 0.00 | 0.22 | 0.00 |
| Lithium             | 0.33 | 0.27 | 0.13 | 0.00 | 0.00 | 0.20 | 0.07 |
| Loperamide          | 0.14 | 0.29 | 0.00 | 0.00 | 0.00 | 0.57 | 0.00 |
| Metamizole          | 0.31 | 0.21 | 0.21 | 0.10 | 0.00 | 0.10 | 0.07 |
| Metformin           | 0.47 | 0.18 | 0.18 | 0.06 | 0.00 | 0.12 | 0.00 |
| Methanol            | 0.13 | 0.40 | 0.20 | 0.02 | 0.06 | 0.04 | 0.14 |
| Methimazole         | 0.00 | 0.00 | 0.00 | 0.00 | 0.00 | 1.00 | 0.00 |
| Methotrexate        | 0.17 | 0.17 | 0.33 | 0.00 | 0.00 | 0.33 | 0.00 |
| Methyldopa          | 0.00 | 0.40 | 0.00 | 0.00 | 0.00 | 0.60 | 0.00 |
| Methylphenidate     | 0.24 | 0.24 | 0.24 | 0.07 | 0.02 | 0.13 | 0.07 |
| Metoclopramide      | 0.09 | 0.27 | 0.27 | 0.00 | 0.00 | 0.36 | 0.00 |
| Metoprolol          | 0.22 | 0.33 | 0.00 | 0.00 | 0.00 | 0.44 | 0.00 |
| Metronidazole       | 0.00 | 0.50 | 0.00 | 0.00 | 0.00 | 0.50 | 0.00 |
| Mifepristone        | 0.00 | 0.25 | 0.25 | 0.00 | 0.00 | 0.50 | 0.00 |
| Mirtazapine         | 0.71 | 0.05 | 0.05 | 0.02 | 0.00 | 0.17 | 0.00 |
| Molsidomine         | 0.00 | 0.22 | 0.00 | 0.00 | 0.22 | 0.56 | 0.00 |
| Morphine            | 0.13 | 0.50 | 0.00 | 0.00 | 0.00 | 0.19 | 0.19 |
| Naloxone            | 0.20 | 0.00 | 0.00 | 0.00 | 0.00 | 0.80 | 0.00 |
| Nicotine            | 0.55 | 0.08 | 0.18 | 0.04 | 0.00 | 0.10 | 0.06 |
| Nifedipine          | 0.07 | 0.29 | 0.07 | 0.00 | 0.00 | 0.36 | 0.21 |
| Norepinephrine      | 0.13 | 0.25 | 0.00 | 0.00 | 0.00 | 0.63 | 0.00 |
| Omeprazole          | 0.33 | 0.25 | 0.17 | 0.00 | 0.00 | 0.25 | 0.00 |
| Ondansetron         | 0.33 | 0.17 | 0.17 | 0.00 | 0.00 | 0.33 | 0.00 |
| Paclitaxel          | 0.44 | 0.04 | 0.20 | 0.00 | 0.08 | 0.24 | 0.00 |
| Pancuronium         | 0.00 | 0.25 | 0.00 | 0.00 | 0.00 | 0.75 | 0.00 |
| Perchlorate         | 0.40 | 0.40 | 0.20 | 0.00 | 0.00 | 0.00 | 0.00 |
| Phenobarbital       | 0.42 | 0.25 | 0.08 | 0.00 | 0.00 | 0.25 | 0.00 |
| Physostigmine       | 0.17 | 0.50 | 0.00 | 0.00 | 0.00 | 0.33 | 0.00 |
| Pilocarpine         | 0.00 | 0.29 | 0.00 | 0.00 | 0.00 | 0.71 | 0.00 |
| Piperacillin        | 0.14 | 0.43 | 0.00 | 0.00 | 0.00 | 0.43 | 0.00 |
| Prednisolone        | 0.29 | 0.29 | 0.14 | 0.00 | 0.00 | 0.29 | 0.00 |
| Propofol            | 0.53 | 0.21 | 0.00 | 0.11 | 0.00 | 0.16 | 0.00 |
| Pyrazinamide        | 0.00 | 0.00 | 0.00 | 0.00 | 0.00 | 1.00 | 0.00 |
| Ramipril            | 0.17 | 0.17 | 0.00 | 0.00 | 0.00 | 0.67 | 0.00 |
| Ranitidine          | 0.50 | 0.10 | 0.00 | 0.00 | 0.00 | 0.30 | 0.10 |
| Repaglinide         | 0.50 | 0.00 | 0.00 | 0.00 | 0.00 | 0.50 | 0.00 |
| Rifampicin          | 0.00 | 0.14 | 0.00 | 0.14 | 0.00 | 0.71 | 0.00 |
| Rituximab           | 0.76 | 0.00 | 0.19 | 0.00 | 0.00 | 0.05 | 0.00 |

|                        |      |      |      |      |      |      |      |
|------------------------|------|------|------|------|------|------|------|
| Rivaroxaban            | 0.33 | 0.11 | 0.22 | 0.22 | 0.06 | 0.00 | 0.06 |
| Sitagliptin            | 0.33 | 0.00 | 0.33 | 0.00 | 0.00 | 0.33 | 0.00 |
| Somatotropin           | 0.38 | 0.08 | 0.15 | 0.15 | 0.00 | 0.15 | 0.08 |
| Spironolactone         | 0.33 | 0.50 | 0.00 | 0.00 | 0.00 | 0.17 | 0.00 |
| Suxamethonium chloride | 0.00 | 1.00 | 0.00 | 0.00 | 0.00 | 0.00 | 0.00 |
| Tamoxifen              | 0.44 | 0.13 | 0.13 | 0.00 | 0.00 | 0.25 | 0.06 |
| Tazobactam             | 0.00 | 0.25 | 0.00 | 0.00 | 0.00 | 0.75 | 0.00 |
| Tramadol               | 0.56 | 0.28 | 0.06 | 0.00 | 0.00 | 0.11 | 0.00 |
| Valproic acid          | 0.31 | 0.13 | 0.25 | 0.00 | 0.00 | 0.25 | 0.06 |
| Vancomycin             | 0.23 | 0.31 | 0.31 | 0.08 | 0.00 | 0.00 | 0.08 |

| English Wikipedia | A    | B    | C    | D    | E    | F    | G    |
|-------------------|------|------|------|------|------|------|------|
| Aciclovir         | 0.57 | 0.17 | 0.09 | 0.04 | 0.00 | 0.13 | 0.00 |
| Allopurinol       | 0.85 | 0.04 | 0.00 | 0.04 | 0.00 | 0.08 | 0.00 |
| Amantadine        | 0.66 | 0.07 | 0.07 | 0.07 | 0.03 | 0.03 | 0.07 |
| Atropine          | 0.21 | 0.50 | 0.07 | 0.00 | 0.00 | 0.07 | 0.14 |
| Buprenorphine     | 0.55 | 0.05 | 0.12 | 0.01 | 0.05 | 0.05 | 0.15 |
| Clopidogrel       | 0.44 | 0.06 | 0.31 | 0.03 | 0.06 | 0.06 | 0.06 |
| Diazepam          | 0.65 | 0.06 | 0.03 | 0.03 | 0.03 | 0.04 | 0.17 |
| Finasteride       | 0.59 | 0.01 | 0.12 | 0.12 | 0.04 | 0.04 | 0.07 |
| Flumazenil        | 0.56 | 0.44 | 0.00 | 0.00 | 0.00 | 0.00 | 0.00 |
| Ibuprofen         | 0.56 | 0.02 | 0.15 | 0.11 | 0.03 | 0.05 | 0.09 |
| Lamotrigine       | 0.67 | 0.06 | 0.08 | 0.00 | 0.05 | 0.05 | 0.11 |
| Loperamide        | 0.35 | 0.10 | 0.00 | 0.00 | 0.00 | 0.40 | 0.15 |
| Methorexate       | 0.71 | 0.10 | 0.00 | 0.05 | 0.00 | 0.05 | 0.10 |
| Mirtazapine       | 0.81 | 0.08 | 0.00 | 0.02 | 0.00 | 0.05 | 0.04 |
| Nifedipine        | 0.68 | 0.11 | 0.00 | 0.00 | 0.00 | 0.21 | 0.00 |
| Paclitaxel        | 0.52 | 0.27 | 0.06 | 0.00 | 0.00 | 0.02 | 0.13 |
| Pilocarpine       | 0.71 | 0.14 | 0.00 | 0.00 | 0.00 | 0.14 | 0.00 |
| Propofol          | 0.59 | 0.04 | 0.02 | 0.22 | 0.02 | 0.00 | 0.12 |
| Rituximab         | 0.66 | 0.03 | 0.09 | 0.03 | 0.06 | 0.03 | 0.11 |
| Vancomycin        | 0.79 | 0.12 | 0.04 | 0.02 | 0.02 | 0.00 | 0.02 |

Legend:

- A: academic publications
- B: textbooks
- C: professional organizations
- D: news media
- E: commercial companies
- F: databases/ prescription info
- G: others
