# Supplementary material for: Accuracy and Completeness of Drug Information in Wikipedia: A Comparison with Standard Textbooks of Pharmacology
Source: PubMed Central journal article supplement (PMC4174509; doi:10.1371/journal.pone.0106930), 2014-09-24
Supplement: pone.0106930.s005.pdf [file pone.0106930.s005.pdf]

**Table S5: Readability scores for German Wikipedia.**

| <b>Amstad</b>        | Textbooks | Wikipedia |
|----------------------|-----------|-----------|
| Aciclovir            | 9.75      | 10.96     |
| Acetylsalicylic acid | 0.99      | 8.00      |
| Azathioprine         | 1.16      | 6.15      |
| Clopidogrel          | 4.21      | 3.40      |
| Metronidazole        | 6.54      | 1.81      |
| Morphine             | 18.33     | 15.82     |
| Nifedipine           | 3.89      | 3.95      |
| Propofol             | 12.89     | 1.03      |
| Spironolacton        | 4.53      | 12.64     |

| <b>1. WSTF</b>       | Textbooks | Wikipedia |
|----------------------|-----------|-----------|
| Aciclovir            | 14.58     | 14.33     |
| Acetylsalicylic acid | 14.35     | 13.98     |
| Azathioprine         | 14.87     | 14.94     |
| Clopidogrel          | 15.08     | 15.80     |
| Metronidazole        | 14.60     | 16.46     |
| Morphine             | 13.20     | 14.61     |
| Nifedipine           | 14.95     | 17.10     |
| Propofol             | 13.50     | 15.87     |
| Spironolacton        | 14.81     | 13.46     |
