# Supplementary material for: Accuracy and Completeness of Drug Information in Wikipedia: A Comparison with Standard Textbooks of Pharmacology
Source: PubMed Central journal article supplement (PMC4174509; doi:10.1371/journal.pone.0106930), 2014-09-24
Supplement: pone.0106930.s006.pdf [file pone.0106930.s006.pdf]

**Table S6: Number of edits and editors per drug article.**

| German Wikipedia     | edits | editors   |           |      |
|----------------------|-------|-----------|-----------|------|
|                      |       | registred | anonymous | bots |
| Acetylsalicylic acid | 206   | 63        | 50        | 12   |
| Aciclovir            | 208   | 63        | 42        | 20   |
| Allopurinol          | 118   | 34        | 24        | 18   |
| Amantadine           | 143   | 46        | 20        | 18   |
| Amiodaron            | 193   | 50        | 35        | 15   |
| Amitriptyline        | 216   | 77        | 33        | 20   |
| Amoxicillin          | 184   | 59        | 34        | 27   |
| Atropine             | 465   | 147       | 111       | 35   |
| Azathioprine         | 178   | 50        | 29        | 19   |
| Benzylpenicillin     | 2     | 2         | 0         | 0    |
| Biperiden            | 98    | 31        | 11        | 17   |
| Bromocriptine        | 66    | 22        | 9         | 12   |
| Buprenorphine        | 368   | 71        | 77        | 17   |
| Caffeine             | 1194  | 347       | 311       | 44   |
| Candesartan          | 82    | 29        | 3         | 11   |
| Carbamazepine        | 160   | 61        | 24        | 19   |
| Ciclosporin          | 135   | 46        | 17        | 18   |
| Ciprofloxacin        | 223   | 67        | 36        | 19   |
| Clarithromycin       | 90    | 28        | 19        | 17   |
| Clopidogrel          | 300   | 67        | 40        | 22   |
| Cocaine              | 1405  | 366       | 354       | 52   |
| Cyclophosphamide     | 154   | 49        | 28        | 24   |
| Diazepam             | 530   | 147       | 138       | 24   |
| Digoxin              | 90    | 28        | 9         | 16   |
| Domperidon           | 97    | 37        | 16        | 14   |
| Doxazosin            | 59    | 19        | 0         | 9    |
| Doxycycline          | 161   | 53        | 24        | 22   |
| Enoxaparin sodium    | 177   | 30        | 4         | 7    |
| Epinephrine          | 660   | 186       | 136       | 35   |
| Estradiol            | 151   | 49        | 18        | 20   |
| Ethambutol           | 66    | 33        | 4         | 13   |
| Ethanol              | 2066  | 501       | 310       | 55   |
| Exenatide            | 111   | 35        | 12        | 7    |
| Finasteride          | 304   | 81        | 84        | 18   |
| Flucloxacillin       | 33    | 9         | 2         | 3    |
| Fluconazole          | 65    | 21        | 3         | 11   |
| Flumazenil           | 87    | 26        | 12        | 14   |
| Furosemide           | 114   | 47        | 20        | 19   |
| Gentamicin           | 179   | 46        | 25        | 22   |
| Glyceryl trinitrate  | 3     | 2         | 0         | 0    |
| Haloperidol          | 298   | 80        | 67        | 22   |
| Hydrochlorothiazide  | 81    | 35        | 10        | 17   |
| Ibuprofen            | 572   | 157       | 149       | 31   |
| Imipenem             | 62    | 24        | 6         | 12   |

|                 |      |     |     |    |
|-----------------|------|-----|-----|----|
| Isoflurane      | 62   | 23  | 6   | 15 |
| Isoniazid       | 80   | 33  | 13  | 17 |
| Lamotrigine     | 195  | 54  | 39  | 19 |
| Levodopa        | 152  | 58  | 34  | 22 |
| Lithium         | 1381 | 320 | 247 | 59 |
| Loperamide      | 133  | 48  | 31  | 13 |
| Metamizole      | 306  | 74  | 61  | 21 |
| Metformin       | 202  | 59  | 40  | 21 |
| Methanol        | 1383 | 271 | 258 | 37 |
| Methotrexate    | 175  | 49  | 55  | 22 |
| Methyldopa      | 85   | 24  | 6   | 15 |
| Methylphenidate | 1418 | 277 | 343 | 17 |
| Metoclopramide  | 158  | 61  | 24  | 17 |
| Metoprolol      | 201  | 52  | 34  | 16 |
| Metronidazol    | 163  | 50  | 30  | 22 |
| Mifepriston     | 165  | 78  | 27  | 18 |
| Mirtazapine     | 288  | 76  | 59  | 15 |
| Molsidomine     | 55   | 19  | 4   | 10 |
| Morphine        | 650  | 195 | 174 | 34 |
| Naloxone        | 156  | 59  | 17  | 19 |
| Nicotine        | 939  | 255 | 202 | 39 |
| Nifedipine      | 114  | 39  | 26  | 12 |
| Norepinephrine  | 240  | 80  | 58  | 24 |
| Omeprazole      | 218  | 61  | 43  | 23 |
| Ondansetron     | 86   | 32  | 5   | 12 |
| Paclitaxel      | 194  | 54  | 29  | 23 |
| Pancuronium     | 73   | 22  | 11  | 17 |
| Perchlorate     | 1    | 1   | 0   | 0  |
| Phenobarbital   | 187  | 70  | 28  | 21 |
| Physostigmine   | 122  | 32  | 18  | 16 |
| Pilocarpine     | 65   | 20  | 8   | 14 |
| Piperacillin    | 53   | 19  | 1   | 12 |
| Prednisolone    | 133  | 42  | 31  | 10 |
| Propofol        | 311  | 88  | 54  | 23 |
| Pyrazinamide    | 56   | 18  | 6   | 15 |
| Ramipril        | 116  | 37  | 25  | 15 |
| Ranitidine      | 152  | 43  | 18  | 20 |
| Rifampicin      | 110  | 34  | 15  | 20 |
| Rituximab       | 139  | 51  | 21  | 15 |
| Rivaroxaban     | 129  | 43  | 15  | 13 |
| Sitagliptin     | 140  | 34  | 15  | 12 |
| Somatropin      | 320  | 87  | 77  | 26 |
| Spironolacton   | 99   | 27  | 16  | 19 |
| Suxamethonium   | 70   | 26  | 4   | 15 |
| Tamoxifen       | 143  | 45  | 15  | 12 |
| Tazobactam      | 31   | 12  | 0   | 9  |
| Thiamazole      | 55   | 14  | 9   | 7  |
| Tramadol        | 442  | 110 | 128 | 22 |
| Vancomycin      | 141  | 53  | 21  | 17 |
